# Supplementary material for: Adherence to Healthy Dietary Patterns and Glioma: A Matched Case-Control Study
Source: MDPI journal article supplement (doi:10.3390/nu15234886), 2023-11-23
Supplement: s1 [file s1]

## **Supplementary material A**

### **Supplemental methods: Components and scoring of the dietary pattern scores**

#### **Mediterranean diet**

According to previous reports, the Mediterranean diet score involved a total of 11 food groups. Intakes for the following food groups should be used to calculate diet scores: grains, fruits, vegetables, legumes, potatoes, fish, red and processed meats, poultry, dairy products, olive oil, and alcohol. These foods were then scored according to the recommended intake, with each food group scoring in the range of 0-5 points. The intake of grains, fruits, vegetables, legumes, potatoes, fish, and olive oil was positively correlated with the scores, while the scores of red and processed meat, poultry and dairy products were distributed in opposite proportions of intake. In particular, 5 points were given for those who drank less than 36g of alcohol per day, 0 points for those who drank more than 84g of alcohol per day or did not consume alcohol, and 4-1 points for those who drank 36g to 84g of alcohol per day. Therefore, the total score ranged between 0-55 points [1].

#### **DASH diet**

The DASH diet scores developed based on the DASH study involved a total of 8 food groups [2]. Intake of fruits, vegetables, nuts and legumes, dairy products, red and processed meats, sugary drinks, whole grains, and sodium was divided into quintiles after adjusting for energy. The scores from the lowest to the highest quintiles in the following food groups are scored 1-5 points: fruits, vegetables, nuts and legumes, dairy

products, and whole grains. Intake of the rest of the foods (sodium, red and processed meat, and sugary drinks) was inverted with the score (minimum to maximum intake quintile was 5-1 points). Therefore, the total score ranges from 8-40 points [3].

### **MIND diet**

Based on the Mediterranean diet and the DASH diet [4], the diet pattern summarized 15 groups of foods closely related to the brain and nerves, including 10 healthy food groups of green leafy vegetables, other vegetables, nuts, berries, legumes, whole grains, fish, poultry, olive oil and wine, and 5 groups of unhealthy foods of red and processed meats, butter, cheese, pastries and sweets, and fried foods. If the study subjects identified olive oil as a daily cooking oil, the score was 1, otherwise, the score was 0. The remaining 14 foods were scored based on recommended intakes, with each scoring 0, 0.5, or 1. Since no food cooking methods were collected in this study, fried foods were not included in the evaluation scope of this study. Therefore, the total score ranged from 0-14 points.

### **Paleolithic diet**

The Paleolithic diet was a dietary pattern based on unprocessed animal and plant food, which was formed by referring to the human lifestyle in the Paleolithic Age [5]. This diet pattern involves a total of 11 food groups in the paleo diet. Fruits, nuts, vegetables, eggs, meat, and fish were advocated, while grains, dairy products, legumes, cooking ingredients (added sugars, salt, and refined fats), and processed foods were considered to be discouraged. Divided into quintiles according to the intake of each food group, the group of foods that advocated intake was scored 1-5 points sequentially according

to the lowest to highest intake, and the group of foods that did not encourage intake scored the opposite. Each food group had the same weight, so its total score ranged from 11-55 points.

### **The PH diet**

This dietary pattern was developed in response to dietary recommendations made by the EAT-Lancet Commission [6]. The PH diet divided food groups into four areas: adequacy, optimum, ratio, and moderation. Adequacy components were foods that did not have a serious health impact even when consumed too much, including nuts and peanuts, legumes, fruits, total vegetables, and whole grains. Optimum components were that food intake should be moderate, and too much or too little could affect health, including eggs, fish and seafood, tubers and potatoes, dairy products, and vegetable oils. In contrast to adequacy components, moderation components were foods that were healthier with a smaller intake, including red meat, chicken and substitutes, animal fats, and added sugars. The ratio components mainly included the ratio of dark green vegetables and red and orange vegetables relative to the total intake of vegetables. Unlike other dietary patterns, this diet score was evaluated based on the ratio of energy provided by different food groups to the total energy. According to the recommended range of caloric density for each food group, the corresponding score was obtained, and each food group scored 0-10 points (0-5 points for each item in the ratio component), so its total score ranged is 0-150 points [7].

### **References:**

1. Panagiotakos, D.B.; Pitsavos, C.; Stefanadis, C. Dietary patterns: a Mediterranean diet score and its relation to clinical and biological markers of cardiovascular disease risk. *Nutr Metab Cardiovas* 2006, 16, 559-568, doi:10.1016/j.numecd.2005.08.006.
2. Vogt, T.M.; Appel, L.J.; Obarzanek, E.; Moore, T.J.; Vollmer, W.M.; Svetkey, L.P.; Sacks, F.M.; Bray, G.A.; Cutler, J.A.; Windhauser, M.M., et al. Dietary Approaches to Stop Hypertension: rationale, design, and methods. DASH Collaborative Research Group. *J Am Diet Assoc* 1999, 99, S12-S18, doi:10.1016/s0002-8223(99)00411-3.
3. Bertoia, M.L.; Triche, E.W.; Michaud, D.S.; Baylin, A.; Hogan, J.W.; Neuhauser, M.L.; Tinker, L.F.; Van Horn, L.; Waring, M.E.; Li, W., et al. Mediterranean and Dietary Approaches to Stop Hypertension dietary patterns and risk of sudden cardiac death in postmenopausal women. *Am J Clin Nutr* 2014, 99, 344-351, doi:10.3945/ajcn.112.056135.
4. Morris, M.C.; Tangney, C.C.; Wang, Y.; Sacks, F.M.; Barnes, L.L.; Bennett, D.A.; Aggarwal, N.T. MIND diet slows cognitive decline with aging. *Alzheimers Dement* 2015, 11, 1015-1022, doi:10.1016/j.jalz.2015.04.011.
5. de la O, V.; Zazpe, I.; Goni, L.; Santiago, S.; Martin-Calvo, N.; Bes-Rastrollo, M.; Martinez, J.A.; Martinez-Gonzalez, M.A.; Ruiz-Canela, M. A score appraising Paleolithic diet and the risk of cardiovascular disease in a Mediterranean prospective cohort. *Eur J Nutr* 2022, 61, 957-971, doi:10.1007/s00394-021-02696-9.

6. Willett, W.; Rockstrom, J.; Loken, B.; Springmann, M.; Lang, T.; Vermeulen, S.; Garnett, T.; Tilman, D.; DeClerck, F.; Wood, A., et al. Food in the Anthropocene: the EAT-Lancet Commission on healthy diets from sustainable food systems. *Lancet* 2019, 393, 447-492, doi:10.1016/S0140-6736(18)31788-4.
7. Cacau, L.T.; De Carli, E.; de Carvalho, A.M.; Lotufo, P.A.; Moreno, L.A.; Bensenor, I.M.; Marchioni, D.M. Development and Validation of an Index Based on EAT-Lancet Recommendations: The Planetary Health Diet Index. *Nutrients* 2021, 13, doi:10.3390/nu13051698.

## **Supplementary material B**

Table S1. Dietary items in the food frequency questionnaire

Table S2. Basic characteristics of all study participants

Table S3. Adjusted ORs and 95% CIs for the association between dietary pattern scores and glioma of different grades

Table S4. Factor loading matrix for the major dietary patterns derived from PCA

Table S5. Adjusted ORs and 95% CIs for gliomas in subgroups

Table S6. Dietary patterns influenced the proportion of gliomas mediated by BMI

Figure S1. The flow chart of the case-control population matching

**Table S1.** Dietary items in the food frequency questionnaire

| Food groups(n)                    | Items                                                                                                                                                                                                                                               |
|-----------------------------------|-----------------------------------------------------------------------------------------------------------------------------------------------------------------------------------------------------------------------------------------------------|
| Refined grains (9)                | Rice, steamed buns, scones, porridge, deep-fried dough sticks, noodles, instant noodles, vermicelli, dumplings                                                                                                                                      |
| Whole grains (2)                  | Corn, Millet and oats, etc                                                                                                                                                                                                                          |
| Tubers (2)                        | Potatoes, sweet potatoes                                                                                                                                                                                                                            |
| Legume and Products (5)           | Soy, soy milk, tofu, other soy products, other legumes                                                                                                                                                                                              |
| Vegetables (23)                   | Green leafy vegetables, kale, cabbage, celery, eggplant, cucumber, white gourd, pumpkin, carrot, radish, green shoot, broccoli, bell pepper, pepper, tomato, lotus root, chive, garlic moss, bitter melon, onion, green bean, zucchini, cauliflower |
| Fungi and algae (4)               | Mushrooms, Auricularia auricula, tremella, kelp                                                                                                                                                                                                     |
| Fruits (20)                       | Apple, pear, orange, banana, peach, watermelon, melon, grape, pineapple, kiwi fruit, strawberries, cherries, blueberries, mulberries, shaddock, hawthorn, pitaya, date, mango, cherry tomato                                                        |
| Red meat (4)                      | pork (muscle), pork (fat & muscle), beef, mutton                                                                                                                                                                                                    |
| Poultry (2)                       | Chicken, duck                                                                                                                                                                                                                                       |
| Animal viscera (4)                | liver, blood, intestine, other viscera                                                                                                                                                                                                              |
| Fish and seafood (5)              | Freshwater fish, sea fish, shrimp, crab, mollusk                                                                                                                                                                                                    |
| Egg (1)                           | Fresh egg                                                                                                                                                                                                                                           |
| Dairy products (4)                | Milk, yogurt, milk powder, cheese                                                                                                                                                                                                                   |
| Nut (4)                           | Peanuts, sunflower seeds, walnuts, other nuts                                                                                                                                                                                                       |
| Sweet food (5)                    | Bread, honey, biscuit, cake, Chinese pastry                                                                                                                                                                                                         |
| Sugary drink (3)                  | Carbonated drinks, fruit and vegetable drinks, functional drinks                                                                                                                                                                                    |
| Tea and coffee (3)                | Green tea, black tea, coffee                                                                                                                                                                                                                        |
| Salt (1)                          | Salt                                                                                                                                                                                                                                                |
| Oils (3)                          | Animal oil olive oil, other vegetable oil                                                                                                                                                                                                           |
| Curing and processed products (6) | Sauerkraut, pickle, fermented bean curd, bacon, sausage and other smoked meat, salted duck eggs, preserved eggs                                                                                                                                     |
| Alcohol (4)                       | Beer, spirit, wine, rice wine                                                                                                                                                                                                                       |

**Table S2.** Basic characteristics of all study participants

|                                  | Case(n=506) | Control(n=506) | <i>p</i> <sup>a</sup> |
|----------------------------------|-------------|----------------|-----------------------|
| Age(years)                       | 42.62±13.09 | 41.15±12.85    | 0.072                 |
| Sex, n(%)                        |             |                | 1.000                 |
| Male                             | 284(56.1)   | 284(56.1)      |                       |
| Female                           | 222(43.9)   | 222(43.9)      |                       |
| BMI(kg/m <sup>2</sup> )          | 24.03±3.25  | 23.05±3.27     | <0.001                |
| High-risk residential area, n(%) |             |                | 0.534                 |
| Yes                              | 108(21.3)   | 100(19.8)      |                       |
| No                               | 398(78.7)   | 406(80.2)      |                       |
| Occupation, n(%)                 |             |                | 0.024                 |
| Manual workers                   | 134(26.5)   | 103(20.4)      |                       |
| Mental workers                   | 265(52.4)   | 306(60.5)      |                       |
| Others                           | 107(21.1)   | 97(19.1)       |                       |
| Education level, n(%)            |             |                | <0.001                |
| Primary school and below         | 35(6.9)     | 13(2.6)        |                       |
| Middle school                    | 210(41.5)   | 127(25.1)      |                       |
| University and above             | 261(51.6)   | 366(72.3)      |                       |
| Household income, n(%)           |             |                | <0.001                |
| <3,000 ¥/month                   | 49(9.7)     | 92(18.2)       |                       |
| 3000-10,000 ¥/month              | 384(75.9)   | 249(49.2)      |                       |
| >10,000 ¥/month                  | 73(14.4)    | 165(32.6)      |                       |
| Smoking status, n(%)             |             |                | 0.039                 |
| Never smoking                    | 354(70.0)   | 381(75.3)      |                       |
| Former smoking                   | 65(12.8)    | 41(8.1)        |                       |
| Current smoking                  | 87(17.2)    | 84(16.6)       |                       |
| Alcohol consumption, n(%)        |             |                | <0.001                |
| Never drinkers                   | 324(64.1)   | 285(56.4)      |                       |
| Occasional drinkers              | 65(12.8)    | 153(30.2)      |                       |
| Frequent drinkers                | 117(23.1)   | 68(13.4)       |                       |
| History of allergies, n(%)       |             |                | <0.001                |
| Yes                              | 39(7.7)     | 74(14.6)       |                       |
| No                               | 467(92.3)   | 432(85.4)      |                       |
| History of head trauma, n(%)     |             |                | 0.474                 |
| Yes                              | 57(11.3)    | 50(9.9)        |                       |
| No                               | 449(88.7)   | 456(90.1)      |                       |
| Family history of cancer, n(%)   |             |                | 0.001                 |
| Yes                              | 152(30.0)   | 107(21.1)      |                       |
| No                               | 354(70.0)   | 399(78.9)      |                       |
| Physical Activity, n(%)          |             |                | <0.001                |
| Low                              | 69(13.6)    | 232(45.8)      |                       |
| Moderate                         | 209(41.3)   | 184(36.4)      |                       |
| Violent                          | 228(45.1)   | 90(17.8)       |                       |



<sup>a</sup>. *p*-values were derived from Student's *t*-tests for continuous variables according to the data distribution and the chi-square test for the classified variables.

**Table S3.** Adjusted ORs and 95% CIs for the association between dietary pattern scores and glioma of different grades

| Glioma grading <sup>a</sup> | Model 1 <sup>b</sup> | <i>p</i> | Model 2 <sup>c</sup> | <i>p</i> |
|-----------------------------|----------------------|----------|----------------------|----------|
| <b>Low grade</b>            |                      |          |                      |          |
| Mediterranean Diet          | 0.94(0.88-0.99)      | 0.037    | 0.85(0.75-0.97)      | 0.013    |
| DASH Diet                   | 0.82(0.75-0.89)      | <0.001   | 0.63(0.47-0.85)      | 0.002    |
| MIND Diet                   | 0.68(0.53-0.87)      | 0.002    | 0.60(0.36-0.99)      | 0.047    |
| Paleolithic Diet            | 0.82(0.75-0.90)      | <0.001   | 0.72(0.59-0.88)      | 0.002    |
| PH Diet                     | 0.99(0.97-1.02)      | 0.692    | 0.98(0.94-1.03)      | 0.445    |
| <b>High grade</b>           |                      |          |                      |          |
| Mediterranean Diet          | 0.94(0.91-0.97)      | <0.001   | 0.90(0.84-0.96)      | 0.002    |
| DASH Diet                   | 0.85(0.82-0.89)      | <0.001   | 0.78(0.70-0.86)      | <0.001   |
| MIND Diet                   | 0.66(0.57-0.76)      | <0.001   | 0.48(0.34-0.69)      | <0.001   |
| Paleolithic Diet            | 0.87(0.84-0.90)      | <0.001   | 0.80(0.73-0.88)      | <0.001   |
| PH Diet                     | 0.99(0.98-1.00)      | 0.164    | 0.99(0.96-1.01)      | 0.352    |

Note: Grade I and III gliomas were small in sample size and were not analyzed separately.

<sup>a</sup>. The results came from dietary scores as continuous variables.

<sup>b</sup>. Model 1: Unadjusted model.

<sup>c</sup>. Model 2: Adjusted for age, BMI, occupation, education level, household income, high-risk residential areas, smoking status, alcohol consumption, history of allergies, history of head trauma, family history of cancer, physical activity, and energy intake.

**Table S4.** Factor loading matrix for the major dietary patterns derived from PCA

|                               | Factor 1 | Factor 2 | Factor 3 | Factor 4 | Factor 5 | Factor 6 |
|-------------------------------|----------|----------|----------|----------|----------|----------|
| Refined grains                |          | 0.520    |          |          |          | 0.365    |
| Whole grains                  | 0.527    |          |          |          |          |          |
| Legume and Products           | 0.553    |          |          |          |          |          |
| Tubers                        | 0.451    |          | 0.414    |          |          |          |
| Vegetables                    | 0.759    |          |          |          |          |          |
| Fungi and algae               | 0.682    |          |          |          |          |          |
| Fruits                        | 0.646    |          |          |          |          |          |
| Red meat                      |          | 0.461    |          |          |          |          |
| Poultry                       |          |          | -0.508   |          |          |          |
| Animal viscera                |          |          |          | 0.436    |          |          |
| Fish and seafood              | 0.544    |          |          |          |          |          |
| Egg                           |          |          |          |          | 0.434    |          |
| Dairy products                | 0.412    |          | -0.377   |          |          |          |
| Nut                           | 0.429    |          |          |          |          |          |
| Sweet food                    | 0.378    |          |          |          |          |          |
| Sugary drink                  |          |          |          |          | -0.446   |          |
| Tea and coffee                |          |          |          | 0.390    | 0.471    |          |
| Salt                          |          | 0.687    |          |          |          |          |
| Oils                          |          | 0.749    |          |          |          |          |
| Curing and processed products |          |          |          |          | -0.401   |          |
| Alcohol                       |          | 0.363    |          | 0.566    |          | 0.415    |

**Table S5.** Adjusted ORs and 95% CIs for gliomas in subgroups

| Subgroup <sup>a</sup>        | Model 1 <sup>d</sup> | <i>p</i> | Model 2 <sup>e</sup> | <i>p</i> |
|------------------------------|----------------------|----------|----------------------|----------|
| <b>Age</b>                   |                      |          |                      |          |
| <b>≤40(n=500)</b>            |                      |          |                      |          |
| Mediterranean Diet           | 0.96(0.93-0.99)      | 0.026    | 1.00(0.96-1.05)      | 0.980    |
| DASH Diet                    | 0.89(0.86-0.92)      | <0.001   | 0.89(0.85-0.94)      | <0.001   |
| MIND Diet                    | 0.74(0.64-0.86)      | <0.001   | 0.65(0.53-0.80)      | <0.001   |
| Paleolithic Diet             | 0.87(0.84-0.91)      | <0.001   | 0.85(0.81-0.90)      | <0.001   |
| PH Diet                      | 1.01(0.99-1.02)      | 0.313    | 1.01(0.99-1.03)      | 0.216    |
| <b>&gt;40(n=512)</b>         |                      |          |                      |          |
| Mediterranean Diet           | 0.90(0.86-0.93)      | <0.001   | 0.90(0.86-0.94)      | <0.001   |
| DASH Diet                    | 0.81(0.78-0.85)      | <0.001   | 0.80(0.76-0.85)      | <0.001   |
| MIND Diet                    | 0.53(0.45-0.63)      | <0.001   | 0.48(0.39-0.60)      | <0.001   |
| Paleolithic Diet             | 0.85(0.81-0.89)      | <0.001   | 0.85(0.81-0.90)      | <0.001   |
| PH Diet                      | 0.97(0.95-0.98)      | <0.001   | 0.97(0.95-0.99)      | 0.001    |
| <b>Sex</b>                   |                      |          |                      |          |
| <b>Male(n=568)</b>           |                      |          |                      |          |
| Mediterranean Diet           | 0.95(0.92-0.98)      | 0.001    | 0.96(0.92-0.99)      | 0.019    |
| DASH Diet                    | 0.84(0.81-0.87)      | <0.001   | 0.83(0.79-0.87)      | <0.001   |
| MIND Diet                    | 0.69(0.60-0.79)      | <0.001   | 0.59(0.49-0.71)      | <0.001   |
| Paleolithic Diet             | 0.87(0.84-0.91)      | <0.001   | 0.87(0.83-0.91)      | <0.001   |
| PH Diet                      | 0.99(0.97-1.00)      | 0.041    | 0.98(0.97-1.00)      | 0.045    |
| <b>Female(n=444)</b>         |                      |          |                      |          |
| Mediterranean Diet           | 0.92(0.89-0.96)      | <0.001   | 0.91(0.86-0.97)      | 0.002    |
| DASH Diet                    | 0.85(0.82-0.89)      | <0.001   | 0.86(0.82-0.92)      | <0.001   |
| MIND Diet                    | 0.58(0.49-0.68)      | <0.001   | 0.54(0.43-0.69)      | <0.001   |
| Paleolithic Diet             | 0.83(0.79-0.87)      | <0.001   | 0.83(0.77-0.88)      | <0.001   |
| PH Diet                      | 0.99(0.98-1.01)      | 0.467    | 1.00(0.98-1.02)      | 0.994    |
| <b>BMI</b>                   |                      |          |                      |          |
| <b>≤23.31(n=506)</b>         |                      |          |                      |          |
| Mediterranean Diet           | 0.97(0.94-1.01)      | 0.090    | 0.97(0.93-1.02)      | 0.266    |
| DASH Diet                    | 0.87(0.83-0.90)      | <0.001   | 0.87(0.83-0.92)      | <0.001   |
| MIND Diet                    | 0.68(0.59-0.79)      | <0.001   | 0.61(0.50-0.75)      | <0.001   |
| Paleolithic Diet             | 0.88(0.84-0.91)      | <0.001   | 0.87(0.83-0.92)      | <0.001   |
| PH Diet                      | 1.00(0.99-1.01)      | 0.977    | 1.00(0.99-1.02)      | 0.658    |
| <b>&gt;23.31(n=506)</b>      |                      |          |                      |          |
| Mediterranean Diet           | 0.91(0.88-0.94)      | <0.001   | 0.93(0.89-0.97)      | 0.002    |
| DASH Diet                    | 0.85(0.82-0.88)      | <0.001   | 0.85(0.81-0.89)      | <0.001   |
| MIND Diet                    | 0.59(0.50-0.70)      | <0.001   | 0.55(0.45-0.68)      | <0.001   |
| Paleolithic Diet             | 0.85(0.81-0.89)      | <0.001   | 0.83(0.79-0.88)      | <0.001   |
| PH Diet                      | 0.98(0.96-0.99)      | 0.002    | 0.98(0.97-1.00)      | 0.083    |
| <b>Occupation</b>            |                      |          |                      |          |
| <b>Manual workers(n=237)</b> |                      |          |                      |          |
| Mediterranean Diet           | 0.95(0.90-0.99)      | 0.040    | 0.97(0.90-1.04)      | 0.340    |

|                                                    |                 |        |                 |        |
|----------------------------------------------------|-----------------|--------|-----------------|--------|
| DASH Diet                                          | 0.84(0.79-0.89) | <0.001 | 0.86(0.79-0.94) | 0.001  |
| MIND Diet                                          | 0.55(0.43-0.71) | <0.001 | 0.47(0.32-0.68) | <0.001 |
| Paleolithic Diet                                   | 0.88(0.83-0.94) | <0.001 | 0.84(0.77-0.92) | <0.001 |
| PH Diet                                            | 0.97(0.95-0.99) | 0.004  | 0.98(0.94-1.01) | 0.110  |
| <b>Mental workers(n=571)</b>                       |                 |        |                 |        |
| Mediterranean Diet                                 | 0.94(0.92-0.98) | <0.001 | 0.96(0.92-0.99) | 0.039  |
| DASH Diet                                          | 0.87(0.84-0.90) | <0.001 | 0.86(0.82-0.90) | <0.001 |
| MIND Diet                                          | 0.71(0.62-0.81) | <0.001 | 0.63(0.53-0.75) | <0.001 |
| Paleolithic Diet                                   | 0.88(0.84-0.91) | <0.001 | 0.87(0.83-0.91) | <0.001 |
| PH Diet                                            | 1.00(0.99-1.01) | 0.786  | 1.00(0.98-1.02) | 0.899  |
| <b>Others(n=204)</b>                               |                 |        |                 |        |
| Mediterranean Diet                                 | 0.88(0.84-0.94) | <0.001 | 0.85(0.77-0.92) | <0.001 |
| DASH Diet                                          | 0.83(0.78-0.88) | <0.001 | 0.80(0.72-0.88) | <0.001 |
| MIND Diet                                          | 0.57(0.44-0.73) | <0.001 | 0.46(0.30-0.70) | <0.001 |
| Paleolithic Diet                                   | 0.79(0.73-0.85) | <0.001 | 0.78(0.70-0.88) | <0.001 |
| PH Diet                                            | 0.98(0.96-1.00) | 0.118  | 0.97(0.94-1.01) | 0.110  |
| <b>Education level</b>                             |                 |        |                 |        |
| <b>Middle school and below(n=385) <sup>b</sup></b> |                 |        |                 |        |
| Mediterranean Diet                                 | 0.92(0.88-0.96) | <0.001 | 0.94(0.89-0.99) | 0.024  |
| DASH Diet                                          | 0.84(0.80-0.88) | <0.001 | 0.86(0.81-0.92) | <0.001 |
| MIND Diet                                          | 0.54(0.44-0.66) | <0.001 | 0.51(0.39-0.68) | <0.001 |
| Paleolithic Diet                                   | 0.85(0.80-0.89) | <0.001 | 0.84(0.78-0.90) | <0.001 |
| PH Diet                                            | 0.98(0.96-0.99) | 0.011  | 0.99(0.97-1.01) | 0.411  |
| <b>University and above(n=627)</b>                 |                 |        |                 |        |
| Mediterranean Diet                                 | 0.93(0.90-0.96) | <0.001 | 0.95(0.91-0.99) | 0.011  |
| DASH Diet                                          | 0.86(0.83-0.89) | <0.001 | 0.86(0.82-0.90) | <0.001 |
| MIND Diet                                          | 0.69(0.60-0.79) | <0.001 | 0.63(0.53-0.74) | <0.001 |
| Paleolithic Diet                                   | 0.87(0.84-0.91) | <0.001 | 0.87(0.83-0.91) | <0.001 |
| PH Diet                                            | 0.99(0.98-1.01) | 0.330  | 0.99(0.98-1.01) | 0.388  |
| <b>Household income</b>                            |                 |        |                 |        |
| <b>&lt;3,000 ¥/month(n=141)</b>                    |                 |        |                 |        |
| Mediterranean Diet                                 | 1.02(0.95-1.08) | 0.644  | 1.01(0.92-1.10) | 0.838  |
| DASH Diet                                          | 0.89(0.82-0.96) | 0.002  | 0.89(0.79-0.99) | 0.028  |
| MIND Diet                                          | 0.75(0.55-1.01) | 0.059  | 0.64(0.41-0.99) | 0.043  |
| Paleolithic Diet                                   | 0.88(0.81-0.96) | 0.003  | 0.86(0.76-0.96) | 0.009  |
| PH Diet                                            | 1.00(0.98-1.03) | 0.840  | 1.03(0.99-1.07) | 0.120  |
| <b>3,000-10,000 ¥/month(n=633)</b>                 |                 |        |                 |        |
| Mediterranean Diet                                 | 0.90(0.87-0.93) | <0.001 | 0.91(0.88-0.95) | <0.001 |
| DASH Diet                                          | 0.84(0.81-0.88) | <0.001 | 0.83(0.79-0.87) | <0.001 |
| MIND Diet                                          | 0.57(0.49-0.67) | <0.001 | 0.49(0.41-0.60) | <0.001 |
| Paleolithic Diet                                   | 0.87(0.84-0.90) | <0.001 | 0.86(0.82-0.90) | <0.001 |
| PH Diet                                            | 0.99(0.98-1.00) | 0.070  | 0.99(0.98-1.01) | 0.446  |
| <b>&gt;10,000 ¥/month(n=238)</b>                   |                 |        |                 |        |
| Mediterranean Diet                                 | 0.99(0.94-1.04) | 0.695  | 0.99(0.93-1.07) | 0.971  |

|                                    |                 |        |                 |        |
|------------------------------------|-----------------|--------|-----------------|--------|
| DASH Diet                          | 0.90(0.85-0.95) | <0.001 | 0.92(0.86-0.99) | 0.019  |
| MIND Diet                          | 0.75(0.61-0.92) | 0.006  | 0.80(0.61-1.04) | 0.100  |
| Paleolithic Diet                   | 0.85(0.79-0.91) | <0.001 | 0.83(0.76-0.91) | <0.001 |
| PH Diet                            | 0.98(0.96-1.00) | 0.113  | 0.98(0.96-1.01) | 0.147  |
| <b>Smoking status</b>              |                 |        |                 |        |
| <b>Never smoking(n=735)</b>        |                 |        |                 |        |
| Mediterranean Diet                 | 0.94(0.91-0.97) | <0.001 | 0.95(0.92-0.99) | 0.010  |
| DASH Diet                          | 0.87(0.84-0.90) | <0.001 | 0.88(0.85-0.91) | <0.001 |
| MIND Diet                          | 0.68(0.60-0.76) | <0.001 | 0.63(0.54-0.74) | <0.001 |
| Paleolithic Diet                   | 0.86(0.83-0.89) | <0.001 | 0.85(0.81-0.89) | <0.001 |
| PH Diet                            | 1.00(0.99-1.01) | 0.650  | 1.00(0.98-1.01) | 0.898  |
| <b>Smoking(n=277) <sup>c</sup></b> |                 |        |                 |        |
| Mediterranean Diet                 | 0.93(0.89-0.97) | 0.002  | 0.93(0.87-0.98) | 0.011  |
| DASH Diet                          | 0.80(0.75-0.86) | <0.001 | 0.76(0.70-0.83) | <0.001 |
| MIND Diet                          | 0.55(0.44-0.70) | <0.001 | 0.38(0.27-0.54) | <0.001 |
| Paleolithic Diet                   | 0.88(0.83-0.93) | <0.001 | 0.87(0.81-0.93) | <0.001 |
| PH Diet                            | 0.97(0.96-0.99) | 0.005  | 0.97(0.95-0.99) | 0.018  |
| <b>History of allergies</b>        |                 |        |                 |        |
| <b>Yes(n=113)</b>                  |                 |        |                 |        |
| Mediterranean Diet                 | 0.91(0.85-0.99) | 0.019  | 0.94(0.85-1.04) | 0.244  |
| DASH Diet                          | 0.88(0.81-0.95) | 0.001  | 0.86(0.77-0.95) | 0.004  |
| MIND Diet                          | 0.67(0.48-0.92) | 0.015  | 0.52(0.33-0.83) | 0.006  |
| Paleolithic Diet                   | 0.93(0.85-1.02) | 0.138  | 0.92(0.83-1.03) | 0.144  |
| PH Diet                            | 0.98(0.95-1.01) | 0.187  | 0.98(0.94-1.02) | 0.222  |
| <b>No(n=899)</b>                   |                 |        |                 |        |
| Mediterranean Diet                 | 0.94(0.92-0.97) | <0.001 | 0.95(0.92-0.98) | 0.001  |
| DASH Diet                          | 0.85(0.83-0.88) | <0.001 | 0.86(0.82-0.89) | <0.001 |
| MIND Diet                          | 0.64(0.57-0.72) | <0.001 | 0.58(0.50-0.68) | <0.001 |
| Paleolithic Diet                   | 0.86(0.83-0.89) | <0.001 | 0.85(0.82-0.88) | <0.001 |
| PH Diet                            | 0.99(0.98-1.00) | 0.087  | 1.00(0.98-1.01) | 0.469  |
| <b>Family history of cancer</b>    |                 |        |                 |        |
| <b>Yes(n=259)</b>                  |                 |        |                 |        |
| Mediterranean Diet                 | 0.93(0.89-0.98) | 0.005  | 0.94(0.88-1.01) | 0.091  |
| DASH Diet                          | 0.86(0.81-0.91) | <0.001 | 0.83(0.77-0.90) | <0.001 |
| MIND Diet                          | 0.74(0.59-0.91) | 0.006  | 0.70(0.52-0.94) | 0.019  |
| Paleolithic Diet                   | 0.85(0.80-0.91) | <0.001 | 0.81(0.74-0.89) | <0.001 |
| PH Diet                            | 1.00(0.98-1.02) | 0.706  | 1.00(0.97-1.02) | 0.751  |
| <b>No(n=753)</b>                   |                 |        |                 |        |
| Mediterranean Diet                 | 0.94(0.91-0.97) | <0.001 | 0.95(0.92-0.99) | 0.005  |
| DASH Diet                          | 0.85(0.83-0.88) | <0.001 | 0.86(0.83-0.89) | <0.001 |
| MIND Diet                          | 0.61(0.54-0.69) | <0.001 | 0.53(0.45-0.62) | <0.001 |
| Paleolithic Diet                   | 0.86(0.84-0.89) | <0.001 | 0.86(0.83-0.90) | <0.001 |
| PH Diet                            | 0.99(0.98-1.00) | 0.010  | 0.99(0.98-1.01) | 0.196  |
| <b>Physical Activity</b>           |                 |        |                 |        |

|                        |                 |        |                 |        |
|------------------------|-----------------|--------|-----------------|--------|
| <b>Low(n=301)</b>      |                 |        |                 |        |
| Mediterranean Diet     | 0.96(0.91-1.01) | 0.085  | 0.95(0.89-1.01) | 0.120  |
| DASH Diet              | 0.91(0.86-0.96) | 0.001  | 0.88(0.82-0.95) | 0.001  |
| MIND Diet              | 0.97(0.79-1.19) | 0.743  | 0.94(0.71-1.26) | 0.696  |
| Paleolithic Diet       | 0.95(0.89-1.01) | 0.099  | 0.93(0.86-1.00) | 0.060  |
| PH Diet                | 1.02(0.99-1.04) | 0.156  | 1.02(0.99-1.05) | 0.122  |
| <b>Moderate(n=393)</b> |                 |        |                 |        |
| Mediterranean Diet     | 0.93(0.90-0.97) | <0.001 | 0.94(0.90-0.99) | 0.014  |
| DASH Diet              | 0.86(0.82-0.90) | <0.001 | 0.86(0.81-0.91) | <0.001 |
| MIND Diet              | 0.65(0.55-0.77) | <0.001 | 0.58(0.47-0.72) | <0.001 |
| Paleolithic Diet       | 0.87(0.83-0.91) | <0.001 | 0.86(0.81-0.91) | <0.001 |
| PH Diet                | 0.98(0.97-0.99) | 0.021  | 0.98(0.96-1.00) | 0.085  |
| <b>Violent(n=318)</b>  |                 |        |                 |        |
| Mediterranean Diet     | 0.93(0.89-0.98) | 0.004  | 0.94(0.88-0.99) | 0.040  |
| DASH Diet              | 0.81(0.76-0.86) | <0.001 | 0.82(0.77-0.89) | <0.001 |
| MIND Diet              | 0.37(0.28-0.48) | <0.001 | 0.34(0.24-0.48) | <0.001 |
| Paleolithic Diet       | 0.82(0.77-0.87) | <0.001 | 0.81(0.75-0.87) | <0.001 |
| PH Diet                | 0.99(0.97-1.01) | 0.226  | 0.98(0.96-1.01) | 0.169  |

<sup>a</sup>. Unconditional logistic regression model was used for subgroup analysis. The results came from dietary scores as continuous variables.

<sup>b</sup>. Middle school and below included primary school and below and middle school.

<sup>c</sup>. Smoking included former smoking, and current smoking.

<sup>d</sup>. Model 1: Unadjusted model.

<sup>e</sup>. Adjusted covariates in model 2 (except for corresponding hierarchical variables).

**Table S6.** Dietary patterns influenced the proportion of gliomas mediated by BMI

| Diet pattern <sup>a</sup> | Total effect        | ADE                 | ACME              | Proportion mediated (%) |
|---------------------------|---------------------|---------------------|-------------------|-------------------------|
| Mediterranean Diet        | -0.07(-0.10, -0.04) | -0.07(-0.10, -0.04) | -0.002(-0.006, 0) | 2.50                    |
| <i>p</i>                  | <0.001              | <0.001              | 0.340             | 0.340                   |
| DASH Diet                 | -0.14(-0.15, -0.11) | -0.13(-0.15, -0.11) | -0.004(-0.01, 0)  | 2.82                    |
| <i>p</i>                  | <0.001              | <0.001              | 0.014             | 0.014                   |
| MIND Diet                 | -0.11(-0.13, -0.09) | -0.11(-0.13, -0.08) | -0.004(-0.01, 0)  | 3.24                    |
| <i>p</i>                  | <0.001              | <0.001              | 0.008             | 0.008                   |
| Paleolithic Diet          | -0.12(-0.14, -0.10) | -0.12(-0.14, -0.10) | -0.003(-0.01, 0)  | 2.56                    |
| <i>p</i>                  | <0.001              | <0.001              | 0.056             | 0.056                   |

Note: ACME: average causal mediation effects; ADE: average direct effects

<sup>a</sup>. Adjusted for age, occupation, education level, household income, high-risk residential areas, smoking status, alcohol consumption, history of allergies, history of head trauma, family history of cancer, physical activity, and energy intake.



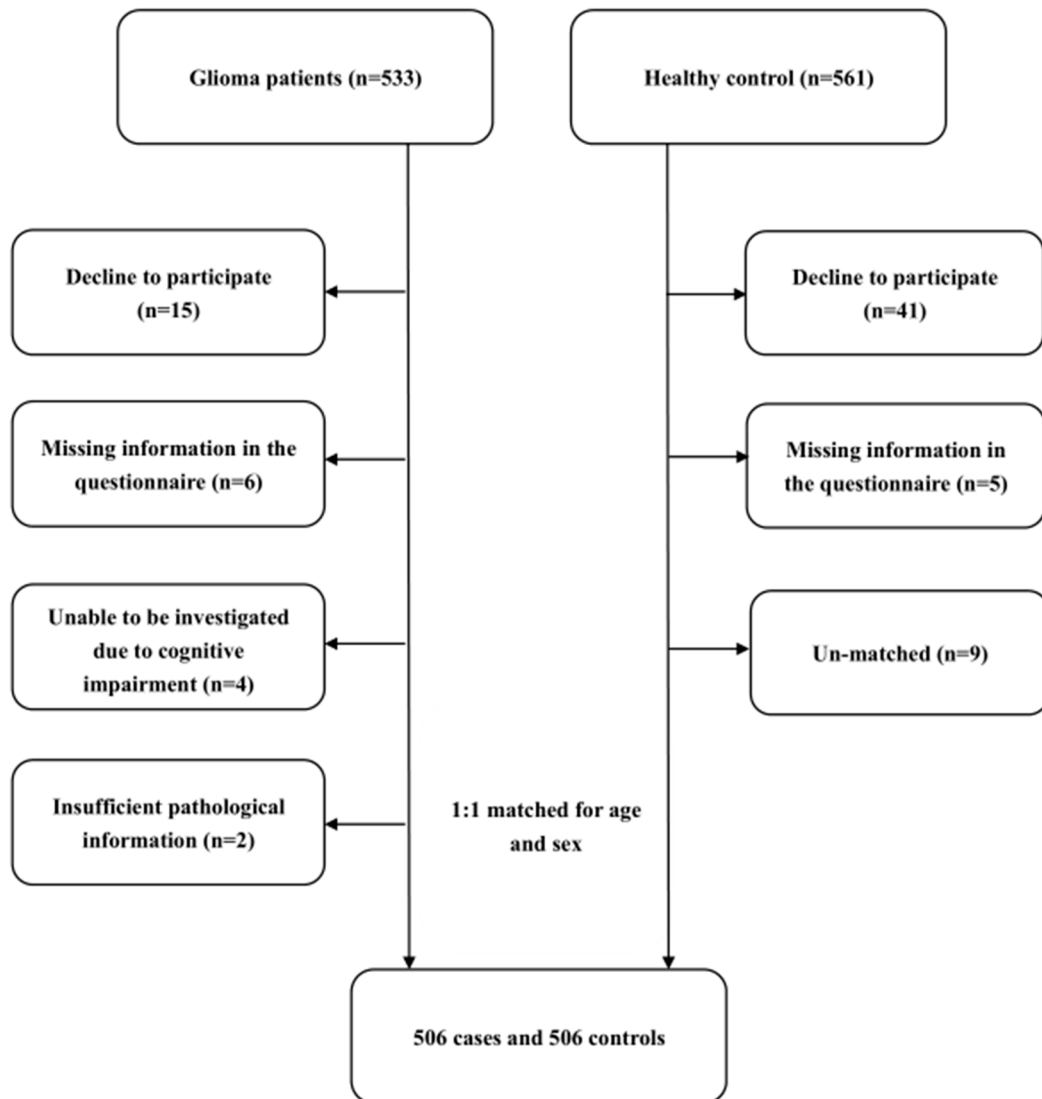

**Figure S1.** The flow chart of the case-control population matching
